# Supplementary material for: An indolizine–rhodamine based FRET fluorescence sensor for highly sensitive and selective detection of Hg2+ in living cells
Source: Royal Society of Chemistry journal article supplement (doi:10.1039/c7ra07938a), 2017-01-01
Supplement: c7ra07938a1.pdf [file c7ra07938a1.pdf]

**An indolizine-rhodamine based FRET fluorescent sensor for high sensitive and selective detection of Hg<sup>2+</sup> in living cells**

Ruixue Ji, Aikun Liu, Shili Shen, Xiaoqun Cao, Fei Li, Yanqing Ge\*

*School of Chemistry and Pharmaceutical Engineering, Taishan Medical University, Taian, Shandong 271016, P. R. China*

**Corresponding Author:** Xiaoqun Cao

E-mail address: geyanqing2016@126.com

Tel.: +86-538-6236195; Fax: +86-538-6229741

## Table of Contents:

|                                                                                                                                                                                                                                             |            |
|---------------------------------------------------------------------------------------------------------------------------------------------------------------------------------------------------------------------------------------------|------------|
| <b>Fig. S1</b> Normalized emission spectra of donor and normalized absorption spectra of <b>TMUHg-1</b> after the addition of $\text{Hg}^{2+}$ (1 eq.).                                                                                     | <b>S3</b>  |
| <b>Fig. S2</b> Changes in absorption spectra of <b>TMUHg-2</b> (10 $\mu\text{M}$ ) in $\text{C}_2\text{H}_5\text{OH}/\text{H}_2\text{O}$ (2/8, v/v, 0.01 M HEPES buffer, pH = 7.20) solution with various amounts of $\text{Hg}^{2+}$ ions. | <b>S3</b>  |
| <b>Fig. S3</b> Fluorescence intensity ratio changes ( $F_{584}/F_{434}$ ) of <b>TMUHg-2</b> (1 $\mu\text{M}$ ) upon gradual addition of $\text{Hg}^{2+}$ in $\text{C}_2\text{H}_5\text{OH}/\text{H}_2\text{O}$                              | <b>S4</b>  |
| <b>Fig. S4</b> Cytotoxicity assays of probe <b>TMUHg-2</b> at different concentrations.                                                                                                                                                     | <b>S4</b>  |
| <b>Fig. S5</b> $^1\text{H}$ NMR spectrum of compound <b>1</b> .                                                                                                                                                                             | <b>S5</b>  |
| <b>Fig. S6</b> $^{13}\text{C}$ NMR spectrum of compound <b>1</b> .                                                                                                                                                                          | <b>S5</b>  |
| <b>Fig. S7</b> $^1\text{H}$ NMR spectrum of compound <b>2</b> .                                                                                                                                                                             | <b>S6</b>  |
| <b>Fig. S8</b> $^{13}\text{C}$ NMR spectrum of compound <b>2</b> .                                                                                                                                                                          | <b>S6</b>  |
| <b>Fig. S9</b> $^1\text{H}$ NMR spectrum of compound <b>3</b> .                                                                                                                                                                             | <b>S7</b>  |
| <b>Fig. S10</b> $^{13}\text{C}$ NMR spectrum of compound <b>3</b> .                                                                                                                                                                         | <b>S7</b>  |
| <b>Fig. S11</b> $^1\text{H}$ NMR spectrum of probe <b>TMUHg-2</b> .                                                                                                                                                                         | <b>S8</b>  |
| <b>Fig. S12</b> $^{13}\text{C}$ NMR spectrum of probe <b>TMUHg-2</b> .                                                                                                                                                                      | <b>S8</b>  |
| <b>Fig. S13</b> HRMS spectrum of probe <b>TMUHg-2</b> .                                                                                                                                                                                     | <b>S9</b>  |
| <b>Fig. S14</b> HRMS spectrum of probe <b>TMUHg-2</b> in the presence of $\text{Hg}^{2+}$ .                                                                                                                                                 | <b>S9</b>  |
| <b>Fig. S15</b> Energy transfer efficiency of <b>TMUHg-2</b>                                                                                                                                                                                | <b>S10</b> |
| <b>Fig. S16</b> The IR spectroscopy of <b>TMUHg-2</b> and <b>TMUHg-2-Hg</b>                                                                                                                                                                 | <b>S10</b> |

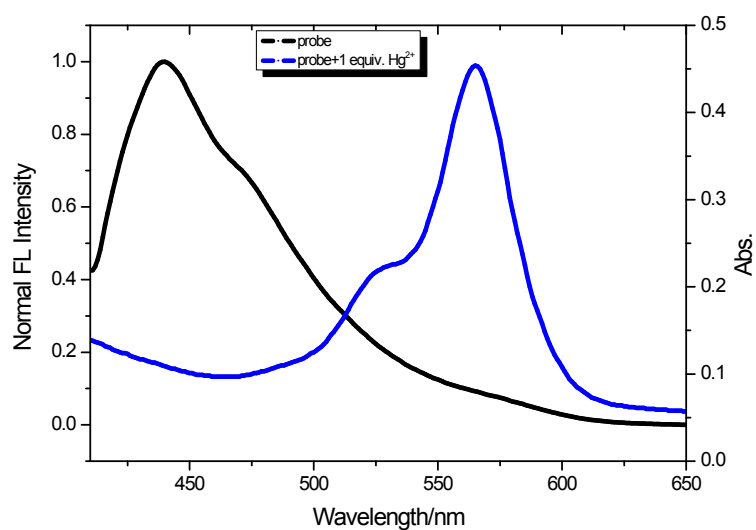

**Fig. S1** Normalized emission spectra of donor **1** (black line) and normalized absorption spectra of **TMUHg-2** (blue line) after the addition of  $\text{Hg}^{2+}$  (1 eq.). Condition: donor **1**, 1  $\mu\text{M}$ ; **TMUHg-2**, 1  $\mu\text{M}$ ;  $\text{C}_2\text{H}_5\text{OH}/\text{H}_2\text{O}$  (2/8, v/v);  $\lambda_{\text{ex}} = 380 \text{ nm}$ ; slit = 15 nm/10 nm).

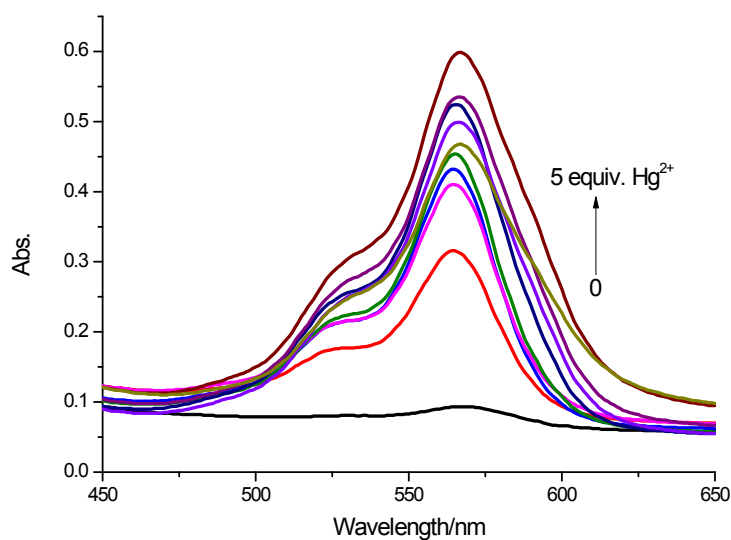

**Fig. S2** Changes in absorption spectra of **TMUHg-2** (10  $\mu\text{M}$ ) in  $\text{C}_2\text{H}_5\text{OH}/\text{H}_2\text{O}$  (2/8, v/v, 0.01 M HEPES buffer, pH = 7.20) solution with various amounts of  $\text{Hg}^{2+}$  ions.

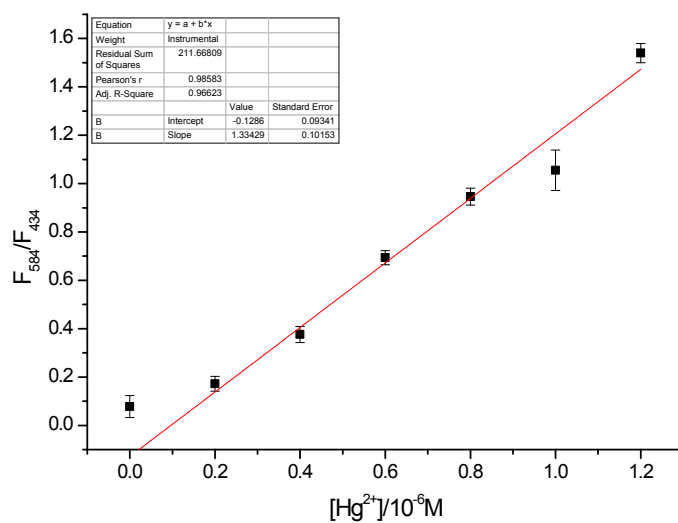

**Fig. S3** Fluorescence intensity ratio changes ( $F_{584}/F_{434}$ ) of **TMUHg-2** (1  $\mu\text{M}$ ) upon gradual addition of  $\text{Hg}^{2+}$  in  $\text{C}_2\text{H}_5\text{OH}/\text{H}_2\text{O}$  (2/8, v/v, 0.01 M HEPES buffer,  $\text{pH} = 7.20$ ) solution ( $\lambda_{\text{ex}} = 380 \text{ nm}$ , slit = 15 nm/10 nm).

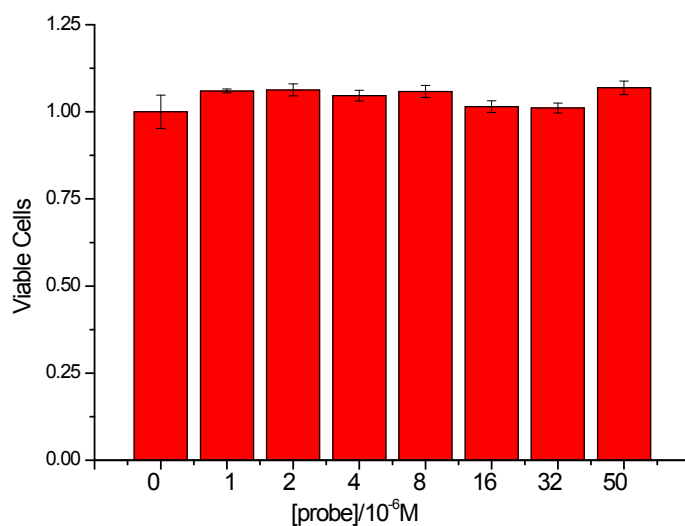

**Fig. S4** Cytotoxicity assays of probe **TMUHg-2** at different concentrations for Glioma cells.

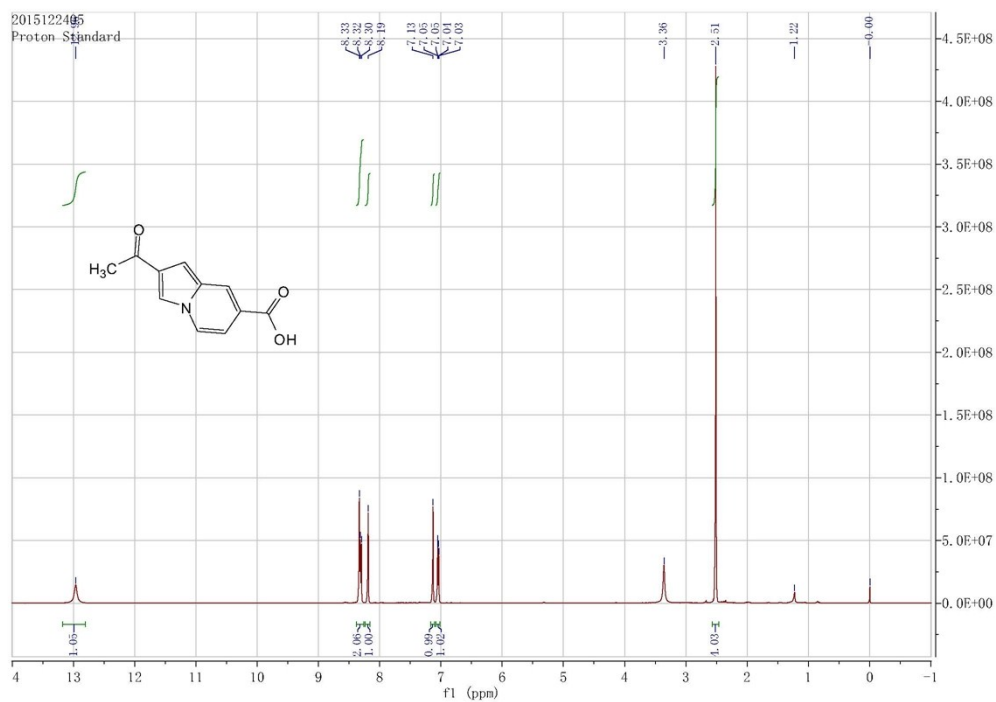

Fig. S5  $^1\text{H}$  NMR spectrum of compound 1.

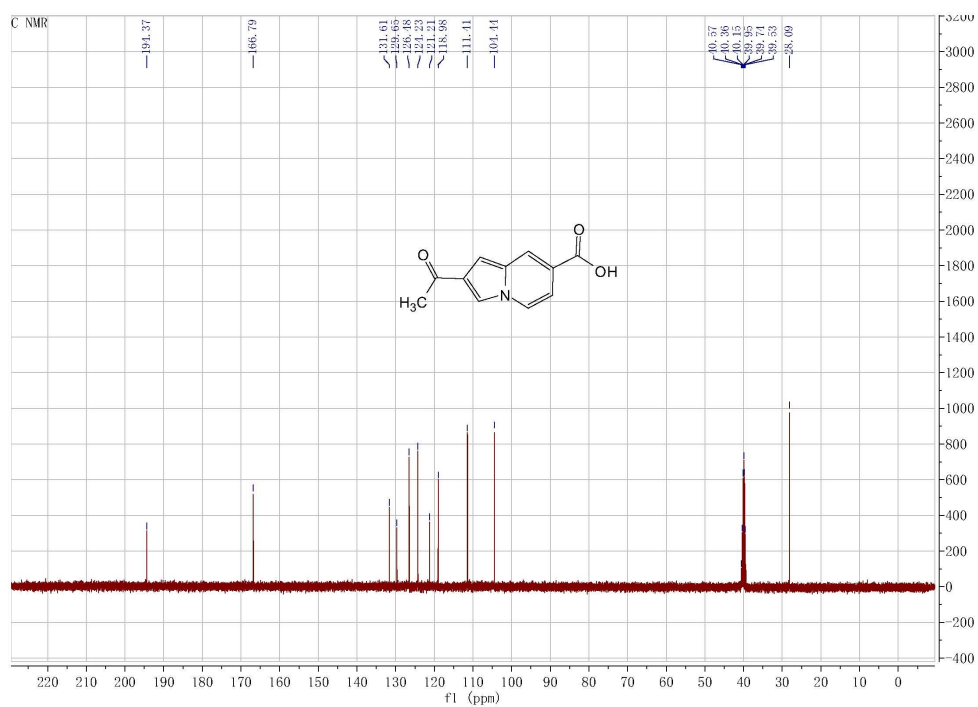

Fig. S6  $^{13}\text{C}$  NMR spectrum of compound 1.

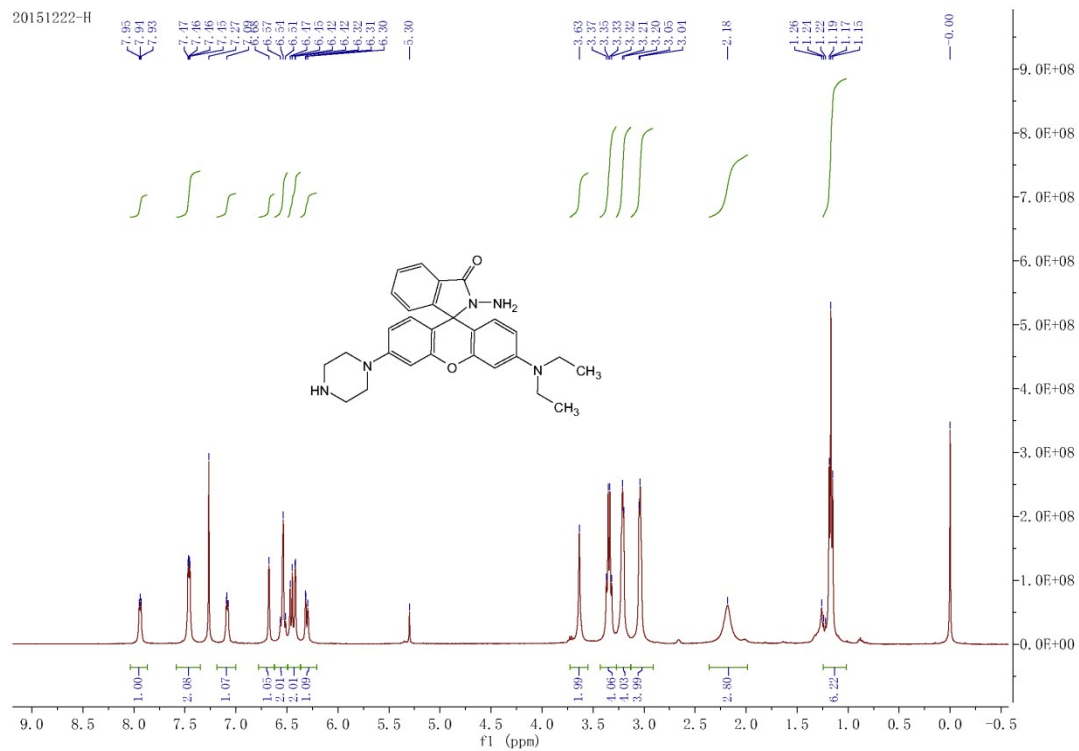

**Fig. S7**  $^1\text{H}$  NMR spectrum of compound 2.

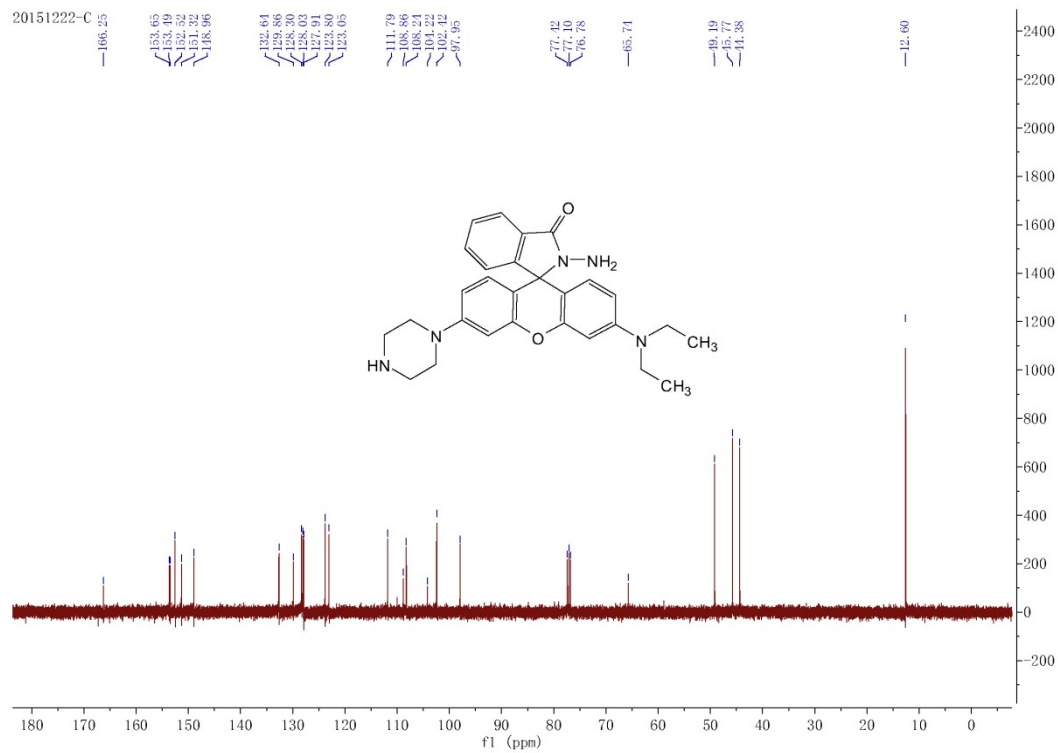

**Fig. S8**  $^{13}\text{C}$  NMR spectrum of compound 2.

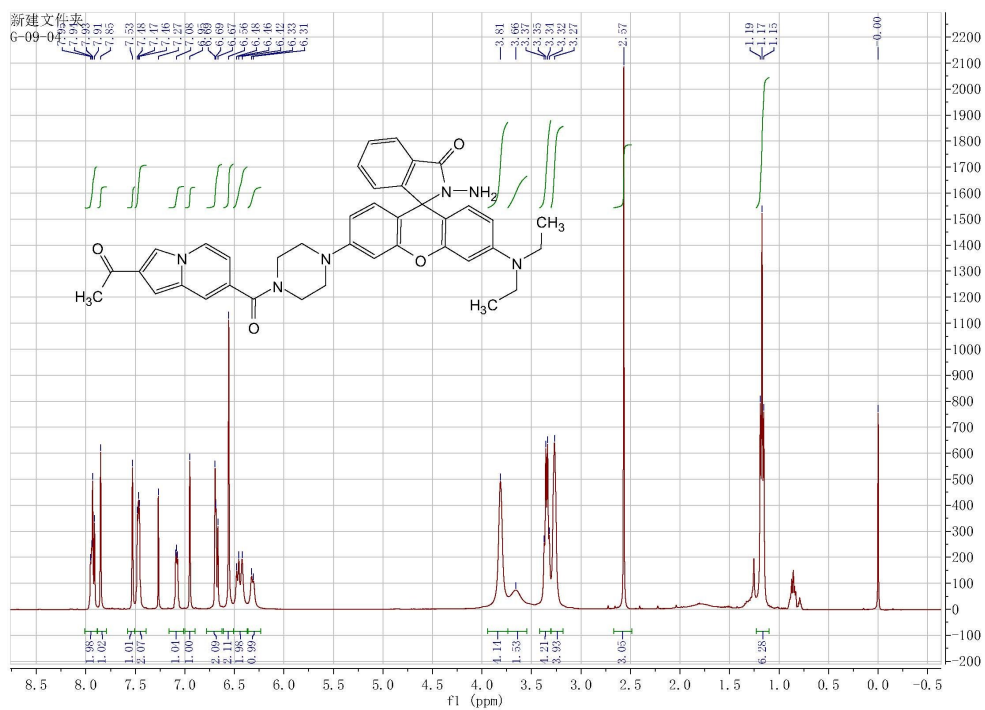

Fig. S9  $^1\text{H}$  NMR spectrum of compound 3.

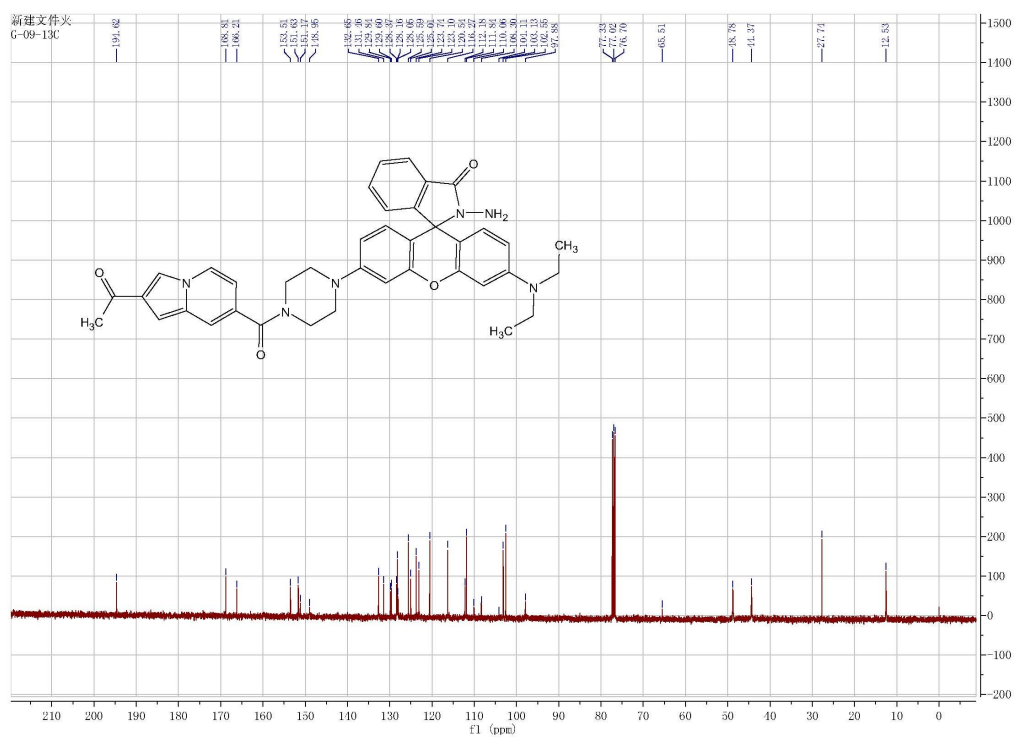

Fig. S10  $^{13}\text{C}$  NMR spectrum of compound 3.

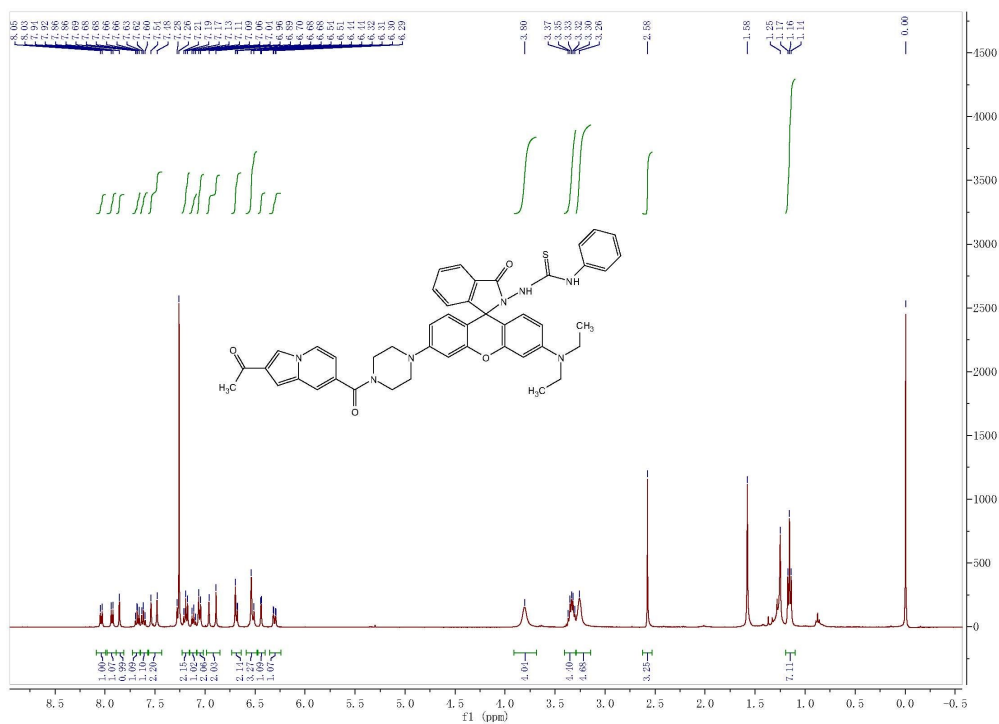

**Fig. S11**  $^1\text{H}$  NMR spectrum of probe **TMUHg-2**

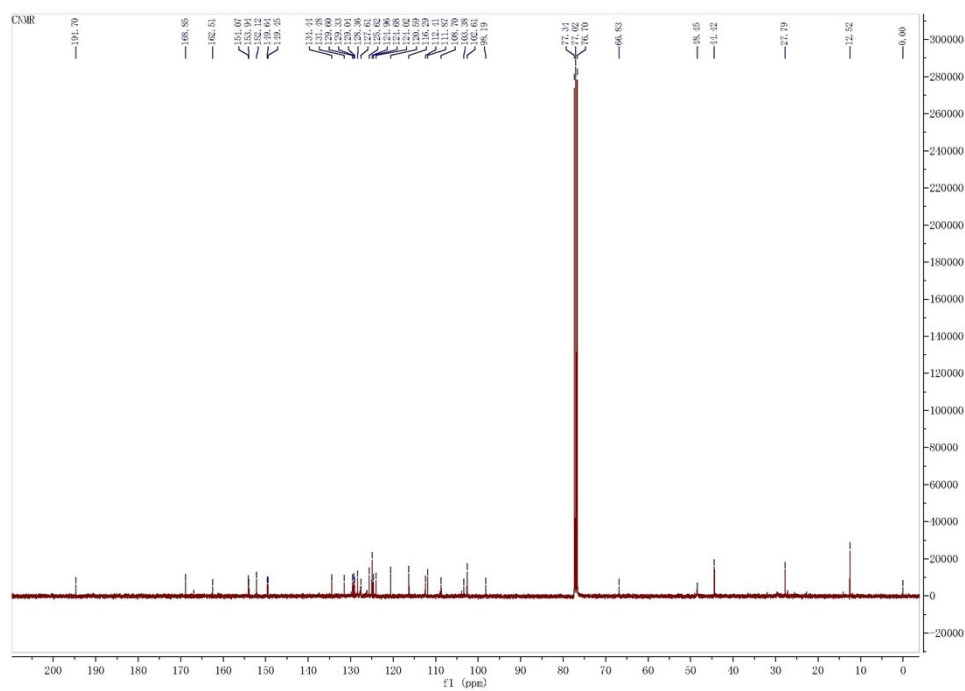

**Fig. S12**  $^{13}\text{C}$  NMR spectrum of probe **TMUHg-2**



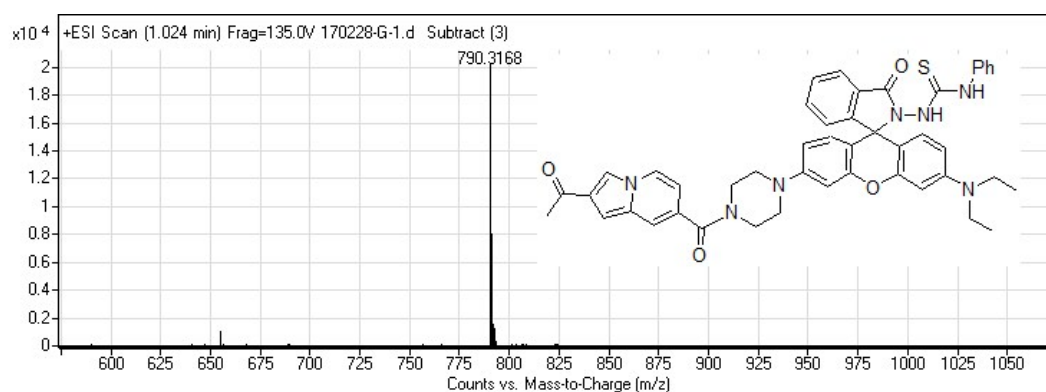

**Fig. S13** HRMS spectrum of probe **TMUHg-2**

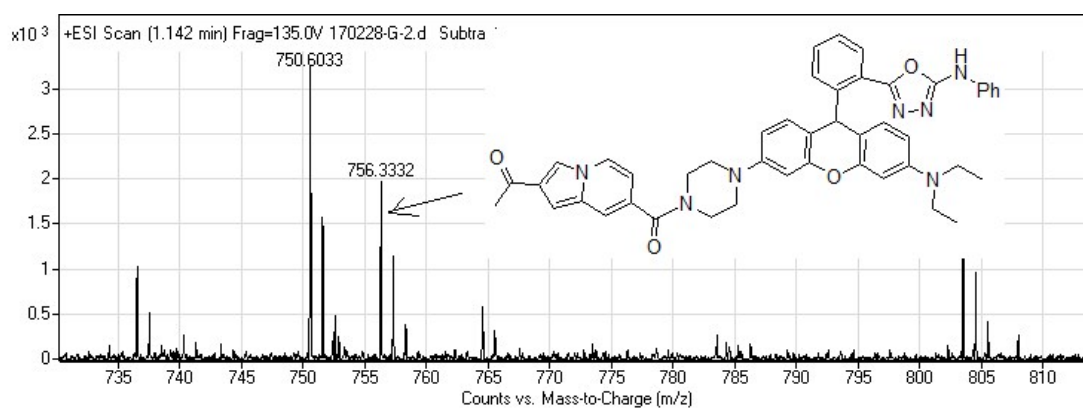

**Fig. S14** HRMS spectrum of probe **TMUHg-2**

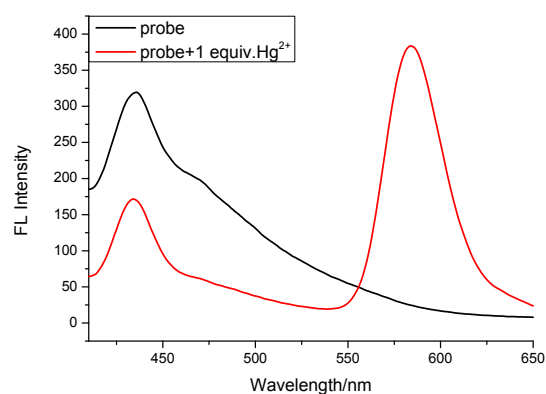

**Fig. S15** The black line is the probe (1  $\mu\text{M}$ ) and the red line is probe (1  $\mu\text{M}$ ) after addition of  $\text{Hg}^{2+}$  (1 eq.) in  $\text{C}_2\text{H}_5\text{OH}/\text{H}_2\text{O}$  solution (2/8, v/v, 0.01 M HEPES buffer, pH = 7.20,  $\lambda_{\text{ex}} = 380$  nm, slit = 15 nm/10 nm).

**Energy transfer efficiency (probe 1) =  $1 - F_{\text{DA}}/F_{\text{D}} = 53.7\%$**

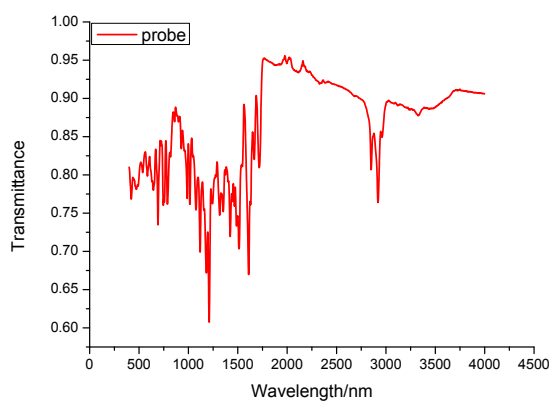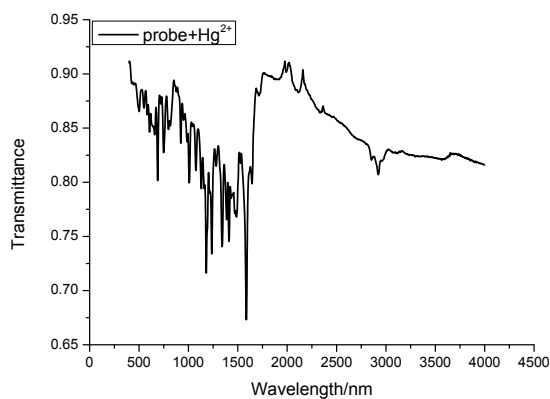

**Fig. S16** The IR spectroscopy of **TMUHg-2** and **TMUHg-2-Hg**
